# Supplementary material
Source: Springer Nature journal article supplement (https://www.springermedizin.de/resource/supplementary/12904_2012_135_MOESM2_ESM.pdf/9517592)

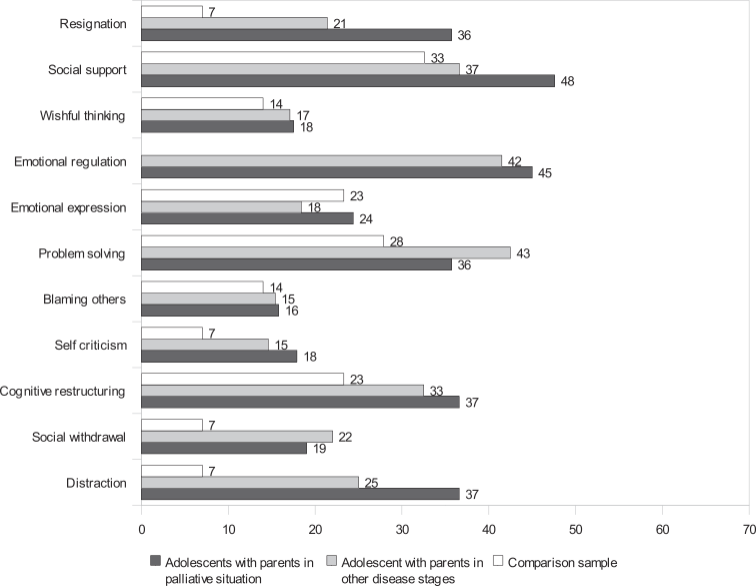

Supplement: MOESM2 [file 9517592]
